# Supplementary material for: Basic knowledge in battery research bridging the gap between academia and industry
Source: Royal Society of Chemistry journal article supplement (doi:10.1039/d0mh00067a), 2020-01-01
Supplement: d0mh00067a1.zip [file d0mh00067a1.zip]

## Sheet: Cover
Electronic supplementary Information
Basic knowledge in battery research
bridging the gap between academia and industry
Makoto Ue,*,a,†, Ken Sakaushia,†, Kohei Uosakia
aCenter for Green Research on Energy and Environmental Materials, National Institute for Materials Science, 1-1 Namiki, Tsukuba, Ibaraki 305-0044, Japan.
*E-mail: UE.Makoto@nims.go.jp
Cell simulator v1.1
All simulations on energy density were carried out by this Excel file made by the author. This Excel file includes six sheets, where the detailed procedure for simulation is given for a LIB and four types of LMBs, respectively. The first sheet explains how to use it. The second sheet is a simulation sheet for LIB(Gr/NCM811). Other sheets are simulation sheets for LMB (Li/NCM622, Li/NCM811, Li/S, …
This cell simulator can be applied for any kind of pouch cells with stacked electrodes as far as the similar cell architecture of LIBs is inherited. The authors encourage for the reader to analyze these sheets to understand the calculation procedures. Depending on the NAMCC you use, you will realize how the cell energy density varies.
Copyright 2020, Makoto Ue

## Sheet: Manual
	User’s manual
	Don’t change the values in pale yellow cells, which include calculation equations.
1	Put the names of components for cathode (active material, conductor, binder), anode (active material, conductor, binder), separator (base film, coating material, binder), and electrolyte (optional; code, solute, solvent, additive) in grey cells.
2	Put specific capacity, mixing ratio, and true density for anode and cathode components, load and true density for separator components, weight fraction of electrolyte components (optional), density for electrolyte, current collectors, tab leads, and load for pouch film in orange cells.
	If the electrolyte absorption by components (binder, coating material, tape) and electrolyte consumption by SEI formation are considered, please put experimental values in orange cells (for more strict simulation).
3	Put sizes for cathode, aode, separator, tab, tab lead, pouch film and pouch cell in white cells.
4	Put areal capacity of cathode (Cs), N/P ratio, and E/C ratio in boxes located on the top.
5	Put average working voltage and layer number, which achieves a targeted cell capacity, in boxes located on the top.
6	Adjust the cell thickness by using expansion rate in a box locatded on the top to show a positive value of free space. When it is positive or negative, the letter turns to green or red color, respectively.
7	Gravimetric and volumetric energy densities, and weight and volume fractions of the components are automatically displayed on the top.

## Sheet: LIB(Gr-TMO)
			Cs	N/P	E/C	Layer n.	Vav	Obtained capacity (Ah)	Expansion rate (%)		Free space (cm3)		Gravimetric energy density (Whkg-1)			284.202
			4	1.05	2.5	7	3.75	1.08864	3.4		0.00485011		Volumetric energy density (Whl-1)			629.175
	Cathode						Anode						Separator						Tab, Tab lead			Electrolyte
	Material	Substance	NCM811	AB	PVDF	Total	Material	Substance	Graphite	CMC	SBR	Total	Material	Substance	Base film	Coating	Binder	Total	Tab	Length (mm)	6	Code	Name	wt%	Wt (g)
		Specific capacity (mAhg-1)	209.3	0	0	209.3		Specific capacity (mAhg-1)	362	0	0	362			PE	Alumina	PVDF-HFP			Width (mm)	8	Solute	Name	0	0
		Mixing ratio (wt%)	96	2	2	100		Mixing ratio (wt%)	97.5	1	1.5	100		Load (mgcm-2)	1.093	0	0	1.093		Area (cm2)	0.48		Name	0	0
		True density (gcm-3)	4.7	1.8	1.78	4.41302		True density (gcm-3)	2.2	1.6	0.95	2.14951		True density (gcm-3)	0.93	0	0	0.93	+ Tab (Al)	Thickness (mm)	12	Solvent	Name	0	0
		Weight (g)	0.743048	0.0154802	0.0154802	0.774009		Weight (g)	0.451094	0.0046266	0.00693991	0.46266		Weight (g)	0.0507152	0	0	0.0507152		Volume (cm3)	0.000576		Name	0	0
		Volume (cm3)	0.158095	0.0086001	0.00869673	0.175392		Volume (cm3)	0.205043	0.00289163	0.00730516	0.215239		Volume (cm3)	0.0545325	0	0	0.0545325		Weight (g)	0.00155462		Name	0	0
	Composite	Thickness (mm)	66				Composite	Thickness (mm)	68				Base film	Thickness (mm)	20				- Tab (Cu)	Thickness (mm)	8	Additive	Name	0	0
		A length (mm)	54					A length (mm)	55.5					#1 length (mm)	58					Volume (cm3)	0.000384		Name	0	0
		B length (mm)	54					B length (mm)	55.5					#2 length (mm)	58					Weight (g)	0.00344064		Name	0	0
		Width (mm)	36					Width (mm)	37.5					Width (mm)	40				Tab lead	Length (mm)	20	Total		0	0
		Area (A+B) (cm2)	38.88					Area (A+B) (cm2)	41.625					Area (cm2)	46.4					Width (mm)	5	Density (gcm-3)			1.1
		Volume (A+B) (cm3)	0.256608					Volume (A+B) (cm3)	0.28305					Volume (cm3)	0.0928					Area (cm2)	1	Load (gAh-1)			2.5
		Weight (A+B) (g)	0.774009					Weight (A+B) (g)	0.46266					Weight (g)	0.0507152				+ Tab lead (Al)	Thickness (mm)	100	Weight (g)			0.3888
		Density (gcm-3)	3.01631					Density (gcm-3)	1.63455					Density (gcm-3)	0.5465					Volume (cm3)	0.01	Volume (cm3)			0.353455
		AM load (mgcm-2)	19.1113					AM load (mgcm-2)	10.8371				Pore	Volume (cm3)	0.0382675					Weight (g)	0.02699	Allocation
		Areal capacity (mAhcm-2)	4					Areal capacity (mAhcm-2)	3.92303					Porosity (%)	41.2366					Density (gcm-3)	2.699	Electrolyte	Place	Const.	Wt (g)
	Pore	Volume (cm3)	0.0812158				Pore	Volume (cm3)	0.0678105				Coating layer	Thickness (A+B) (mm)	0				- Tabl lead (Ni/Cu)	Thickness (mm)	100	Pore uptake (cm3)	Cathode	0.0812158	0.0893374
		Porosity (%)	31.6498					Porosity (%)	23.9571					Length (#1+#2) (mm)	116					Volume (cm3)	0.01		Anode	0.0678105	0.0745916
	Substrate (Al)	Thickness (mm)	12				Substrate (Cu)	Thickness (mm)	8					Width (mm)	40					Weight (g)	0.08902		Base film	0.0382675	0.0420943
		Length (mm)	54					Length (mm)	55.5					Area (cm2)	46.4					Density (gcm-3)	8.902		Coating layer	1e-05	1.1e-05
		Width (mm)	36					Width (mm)	37.5					Volume (cm3)	1e-05				Pouch film			Absorption uptake (gg-1)	PVDF	0.14	0.00216722
		Area (cm2)	19.44					Area (cm2)	20.8125					Weight (g)	0				Nylon/Al/CPP	Thickness (mm)	88		CMC	0.02	9.25321e-05
		Volume (cm3)	0.023328					Volume (cm3)	0.01665					Density (gcm-3)	0					Length (mm)	145.137		SBR	0	0
		Weight (g)	0.0629623					Weight (g)	0.149184				Pore	Volume (cm3)	1e-05					Width (mm)	44.0685		Alumina	0	0
		Density (gcm-3)	2.699					Density (gcm-3)	8.96					Porosity (%)	100					Area (cm2)	63.9596		PVDF-HFP	0.14	0
	Electrode	Thickness (mm)	144				Electrode	Thickness (mm)	144				Coating separator	Thickness (mm)	20					Volume (cm3)	0.562844	SEI formation (mgcm-2)	Cathode	0	0
		Volume (cm3)	0.279936					Volume (cm3)	0.2997					Volume (cm3)	0.09281					Weight (g)	0.930612		Anode	0	0
		Weight (g)	0.836971					Weight (g)	0.611844					Weight (g)	0.0507152					Load (mgcm-2)	14.55	Void (cm3)	Free space	0.164096	0.180506
	Cell							Material	Wt (g)	Wt (%)	Vol (cm3)	Vol (%)
	Element	Thickness (mm)	328					NCM811	5.20134	36.2099	1.10667	17.0686
		Length (mm)	58					AB	0.108361	0.754372	0.0602007	0.9285
		Width (mm)	40					PVDF	0.108361	0.754372	0.0608771	0.938933
		Area (cm2)	23.2					Substrate (Al)	0.503698	3.50657	0.186624	2.87838
		Volume (cm3)	1.02686					Graphite	3.15766	21.9825	1.4353	22.1372
		Weight (g)	1.89333					CMC	0.0323862	0.225461	0.0202414	0.312192
		N/P raio	1.05					SBR	0.0485793	0.338192	0.0511362	0.788694
		Capacity (mAh)	155.52					Substrate (Cu)	1.04429	7.26996	0.11655	1.7976
	Package	Layer number	7					PE	0.355006	2.47143	0.381727	5.88754
		Thickness (mm)	2.484					Alumina	0	0	0	0
		Expansion (%)	3.4					PVDF-HFP	0	0	0	0
		Expanded thickness (mm)	2.56846					Electrolyte	2.7216	18.9468	2.47418	38.1604
		x length (mm)	60					Tab	0.0365215	0.25425	0.007296	0.112529
		y length (mm)	10					Tab lead	0.11601	0.807621	0.02	0.308468
		Width (mm)	41.5					Pouch film	0.930612	6.47859	0.562844	8.68099
		Area (cm2)	24.9					Total	14.3644	100	6.48365	100
		Volume (cm3)	6.4885
		Free space (cm3)	0.00485011
		Weight (g)	14.3644
		Density (g/cm-3)	2.21383
	Spec.	Capacity (Ah)	1.08864
		Voltage (V)	3.75
		Energy (Wh)	4.0824
		Energy density (Whkg-1)	284.202
		Energy density (Whl-1)	629.175

## Sheet: LMB(NCM622)
			Cs	N/P	E/C	Layer n.	Vav	Obtained capacity (Ah)	Expansion rate (%)		Free space (cm3)		Gravimetric energy density (Whkg-1)			292.101
			3.8	3	3	7	3.73	1.03421	22.2		0.00202581		Volumetric energy density (Whl-1)			536.756
	Cathode						Anode						Separator						Tab, Tab lead			Electrolyte
	Material	Substance	NCM622	Carbon 1	Binder 1	Total	Material	Substance	Li	Carbon 2	Binder 2	Total	Material	Substance	Base film	Coating	Binder 3	Total	Tab	Length (mm)	6	Code	Name	wt%	Wt (g)
		Specific capacity (mAhg-1)	180	0	0	180		Specific capacity (mAhg-1)	3860	0	0	3860			PE	Name 1	Name 2			Width (mm)	8	Solute	Name	0	0
		Mixing ratio (wt%)	96	2	2	100		Mixing ratio (wt%)	100	0	0	100		Load (mgcm-2)	1.093	0	0	1.093		Area (cm2)	0.48		Name	0	0
		True density (gcm-3)	4.7	1.8	1.78	4.41302		True density (gcm-3)	0.534	0	0	0.534		True density (gcm-3)	0.93	0	0	0.93	+ Tab (Al)	Thickness (mm)	15	Solvent	Name	0	0
		Weight (g)	0.8208	0.0171	0.0171	0.855		Weight (g)	0.114827	0	0	0.114827		Weight (g)	0.0507152	0	0	0.0507152		Volume (cm3)	0.00072		Name	0	0
		Volume (cm3)	0.174638	0.0095	0.00960674	0.193745		Volume (cm3)	0.215032	0	0	0.215032		Volume (cm3)	0.0545325	0	0	0.0545325		Weight (g)	0.00194328		Name	0	0
	Composite	Thickness (mm)	67				Composite	Thickness (mm)	50				Base film	Thickness (mm)	20				- Tab (Cu)	Thickness (mm)	8	Additive	Name	0	0
		A length (mm)	54					A length (mm)	55.5					#1 length (mm)	58					Volume (cm3)	0.000384		Name	0	0
		B length (mm)	54					B length (mm)	55.5					#2 length (mm)	58					Weight (g)	0.00344064		Name	0	0
		Width (mm)	36					Width (mm)	37.5					Width (mm)	40				Tab lead	Length (mm)	20	Total		0	0
		Area (A+B) (cm2)	38.88					Area (A+B) (cm2)	41.625					Area (cm2)	46.4					Width (mm)	5	Density (gcm-3)			1.1
		Volume (A+B) (cm3)	0.260496					Volume (A+B) (cm3)	0.208125					Volume (cm3)	0.0928					Area (cm2)	1	Load (gAh-1)			3
		Weight (A+B) (g)	0.855					Weight (A+B) (g)	0.114827					Weight (g)	0.0507152				+ Tab lead (Al)	Thickness (mm)	100	Weight (g)			0.443232
		Density (gcm-3)	3.2822					Density (gcm-3)	0.551721					Density (gcm-3)	0.5465					Volume (cm3)	0.01	Volume (cm3)			0.402938
		AM load (mgcm-2)	21.1111					AM load (mgcm-2)	2.75861				Pore	Volume (cm3)	0.0382675					Weight (g)	0.02699	Allocation
		Areal capacity (mAhcm-2)	3.8					Areal capacity (mAhcm-2)	10.6482					Porosity (%)	41.2366					Density (gcm-3)	2.699	Electrolyte	Place	Const.	Wt (g)
	Pore	Volume (cm3)	0.066751				Pore	Volume (cm3)	-0.00690673				Coating layer	Thickness (A+B) (mm)	0				- Tabl lead (Ni/Cu)	Thickness (mm)	100	Pore uptake (cm3)	Cathode	0.066751	0.0734261
		Porosity (%)	25.6246					Porosity (%)	-3.31855					Length (#1+#2) (mm)	116					Volume (cm3)	0.01		Anode	-0.00690673	-0.0075974
	Substrate (Al)	Thickness (mm)	15				Substrate (Cu)	Thickness (mm)	8					Width (mm)	40					Weight (g)	0.08902		Base film	0.0382675	0.0420943
		Length (mm)	54					Length (mm)	55.5					Area (cm2)	46.4					Density (gcm-3)	8.902		Coating layer	1e-05	1.1e-05
		Width (mm)	36					Width (mm)	37.5					Volume (cm3)	1e-05				Pouch film			Absorption uptake (gg-1)	Binder 1	0	0
		Area (cm2)	19.44					Area (cm2)	20.8125					Weight (g)	0				Nylon/Al/CPP	Thickness (mm)	115		Carbon 2	0	0
		Volume (cm3)	0.02916					Volume (cm3)	0.01665					Density (gcm-3)	0					Length (mm)	145.68		Binder 2	0	0
		Weight (g)	0.0787028					Weight (g)	0.149184				Pore	Volume (cm3)	1e-05					Width (mm)	44.3399		Name 1	0	0
		Density (gcm-3)	2.699					Density (gcm-3)	8.96					Porosity (%)	100					Area (cm2)	64.5943		Name 2	0	0
	Electrode	Thickness (mm)	149				Electrode	Thickness (mm)	108				Coating separator	Thickness (mm)	20					Volume (cm3)	0.742835	SEI formation (mgcm-2)	Cathode	0	0
		Volume (cm3)	0.289656					Volume (cm3)	0.224775					Volume (cm3)	0.09281					Weight (g)	1.1304		Anode	0	0
		Weight (g)	0.933703					Weight (g)	0.264011					Weight (g)	0.0507152					Load (mgcm-2)	17.5	Void (cm3)	Free space	0.304816	0.335298
	Cell							Material	Wt (g)	Wt (%)	Vol (cm3)	Vol (%)
	Element	Thickness (mm)	297					NCM622	5.7456	43.5063	1.22247	17.0145
		Length (mm)	58					Carbon 1	0.1197	0.906381	0.0665	0.925559
		Width (mm)	40					Binder 1	0.1197	0.906381	0.0672472	0.935959
		Area (cm2)	23.2					Substrate (Al)	0.629623	4.76757	0.23328	3.24683
		Volume (cm3)	1.01128					Li	0.803789	6.08637	1.50522	20.95
		Weight (g)	1.69704					Carbon 2	0	0	0	0
		N/P raio	3					Binder 2	0	0	0	0
		Capacity (mAh)	147.744					Substrate (Cu)	1.04429	7.90746	0.11655	1.62216
	Package	Layer number	7					PE	0.355006	2.68814	0.381727	5.31295
		Thickness (mm)	2.324					Name 1	0	0	0	0
		Expansion (%)	22.2					Name 2	0	0	0	0
		Expanded thickness (mm)	2.83993					Electrolyte	3.10262	23.4934	2.82057	39.2572
		x length (mm)	60					Tab	0.0396307	0.300088	0.008448	0.117581
		y length (mm)	10					Tab lead	0.11601	0.87844	0.02	0.278364
		Width (mm)	41.5					Pouch film	1.1304	8.55951	0.742835	10.3389
		Area (cm2)	24.9					Total	13.2064	100	7.18484	100
		Volume (cm3)	7.18687
		Free space (cm3)	0.00202581
		Weight (g)	13.2064
		Density (g/cm-3)	1.83757
	Spec.	Capacity (Ah)	1.03421
		Voltage (V)	3.73
		Energy (Wh)	3.8576
		Energy density (Whkg-1)	292.101
		Energy density (Whl-1)	536.756

## Sheet: LMB(NCM811)
			Cs	N/P	E/C	Layer n.	Vav	Obtained capacity (Ah)	Expansion rate (%)		Free space (cm3)		Gravimetric energy density (Whkg-1)			349.739
			4	2.5	2.5	7	3.8	1.08864	14.6		0.00653753		Volumetric energy density (Whl-1)			656.396
	Cathode						Anode						Separator						Tab, Tab lead			Electrolyte
	Material	Substance	NCM811	Carbon 1	Binder 1	Total	Material	Substance	Li	Carbon 2	Binder 2	Total	Material	Substance	Base film	Coating	Binder 3	Total	Tab	Length (mm)	6	Code	Name	wt%	Wt (g)
		Specific capacity (mAhg-1)	209.3	0	0	209.3		Specific capacity (mAhg-1)	3860	0	0	3860			PE	Name 1	Name 2			Width (mm)	8	Solute	Name	0	0
		Mixing ratio (wt%)	96	2	2	100		Mixing ratio (wt%)	100	0	0	100		Load (mgcm-2)	1.093	0	0	1.093		Area (cm2)	0.48		Name	0	0
		True density (gcm-3)	4.7	1.8	1.78	4.41302		True density (gcm-3)	0.534	0	0	0.534		True density (gcm-3)	0.93	0	0	0.93	+ Tab (Al)	Thickness (mm)	12	Solvent	Name	0	0
		Weight (g)	0.743048	0.0154802	0.0154802	0.774009		Weight (g)	0.100725	0	0	0.100725		Weight (g)	0.0507152	0	0	0.0507152		Volume (cm3)	0.000576		Name	0	0
		Volume (cm3)	0.158095	0.0086001	0.00869673	0.175392		Volume (cm3)	0.188624	0	0	0.188624		Volume (cm3)	0.0545325	0	0	0.0545325		Weight (g)	0.00155462		Name	0	0
	Composite	Thickness (mm)	66				Composite	Thickness (mm)	46				Base film	Thickness (mm)	20				- Tab (Cu)	Thickness (mm)	8	Additive	Name	0	0
		A length (mm)	54					A length (mm)	55.5					#1 length (mm)	58					Volume (cm3)	0.000384		Name	0	0
		B length (mm)	54					B length (mm)	55.5					#2 length (mm)	58					Weight (g)	0.00344064		Name	0	0
		Width (mm)	36					Width (mm)	37.5					Width (mm)	40				Tab lead	Length (mm)	20	Total		0	0
		Area (A+B) (cm2)	38.88					Area (A+B) (cm2)	41.625					Area (cm2)	46.4					Width (mm)	5	Density (gcm-3)			1.1
		Volume (A+B) (cm3)	0.256608					Volume (A+B) (cm3)	0.191475					Volume (cm3)	0.0928					Area (cm2)	1	Load (gAh-1)			2.5
		Weight (A+B) (g)	0.774009					Weight (A+B) (g)	0.100725					Weight (g)	0.0507152				+ Tab lead (Al)	Thickness (mm)	100	Weight (g)			0.3888
		Density (gcm-3)	3.01631					Density (gcm-3)	0.52605					Density (gcm-3)	0.5465					Volume (cm3)	0.01	Volume (cm3)			0.353455
		AM load (mgcm-2)	19.1113					AM load (mgcm-2)	2.41983				Pore	Volume (cm3)	0.0382675					Weight (g)	0.02699	Allocation
		Areal capacity (mAhcm-2)	4					Areal capacity (mAhcm-2)	9.34054					Porosity (%)	41.2366					Density (gcm-3)	2.699	Electrolyte	Place	Const.	Wt (g)
	Pore	Volume (cm3)	0.0812158				Pore	Volume (cm3)	0.00285068				Coating layer	Thickness (A+B) (mm)	0				- Tabl lead (Ni/Cu)	Thickness (mm)	100	Pore uptake (cm3)	Cathode	0.0812158	0.0893374
		Porosity (%)	31.6498					Porosity (%)	1.4888					Length (#1+#2) (mm)	116					Volume (cm3)	0.01		Anode	0.00285068	0.00313574
	Substrate (Al)	Thickness (mm)	12				Substrate (Cu)	Thickness (mm)	8					Width (mm)	40					Weight (g)	0.08902		Base film	0.0382675	0.0420943
		Length (mm)	54					Length (mm)	55.5					Area (cm2)	46.4					Density (gcm-3)	8.902		Coating layer	1e-05	1.1e-05
		Width (mm)	36					Width (mm)	37.5					Volume (cm3)	1e-05				Pouch film			Absorption uptake (gg-1)	Binder 1	0	0
		Area (cm2)	19.44					Area (cm2)	20.8125					Weight (g)	0				Nylon/Al/CPP	Thickness (mm)	88		Carbon 2	0	0
		Volume (cm3)	0.023328					Volume (cm3)	0.01665					Density (gcm-3)	0					Length (mm)	144.987		Binder 2	0	0
		Weight (g)	0.0629623					Weight (g)	0.149184				Pore	Volume (cm3)	1e-05					Width (mm)	43.9937		Name 1	0	0
		Density (gcm-3)	2.699					Density (gcm-3)	8.96					Porosity (%)	100					Area (cm2)	63.7853		Name 2	0	0
	Electrode	Thickness (mm)	144				Electrode	Thickness (mm)	100				Coating separator	Thickness (mm)	20					Volume (cm3)	0.561311	SEI formation (mgcm-2)	Cathode	0	0
		Volume (cm3)	0.279936					Volume (cm3)	0.208125					Volume (cm3)	0.09281					Weight (g)	0.928076		Anode	0	0
		Weight (g)	0.836971					Weight (g)	0.249909					Weight (g)	0.0507152					Load (mgcm-2)	14.55	Void (cm3)	Free space	0.231111	0.254222
	Cell							Material	Wt (g)	Wt (%)	Vol (cm3)	Vol (%)
	Element	Thickness (mm)	284					NCM811	5.20134	43.9735	1.10667	17.5779
		Length (mm)	58					Carbon 1	0.108361	0.916115	0.0602007	0.956203
		Width (mm)	40					Binder 1	0.108361	0.916115	0.0608771	0.966947
		Area (cm2)	23.2					Substrate (Al)	0.503698	4.2584	0.186624	2.96426
		Volume (cm3)	0.935286					Li	0.705078	5.96092	1.32037	20.9722
		Weight (g)	1.53139					Carbon 2	0	0	0	0
		N/P raio	2.5					Binder 2	0	0	0	0
		Capacity (mAh)	155.52					Substrate (Cu)	1.04429	8.8287	0.11655	1.85123
	Package	Layer number	7					PE	0.355006	3.00132	0.381727	6.0632
		Thickness (mm)	2.176					Name 1	0	0	0	0
		Expansion (%)	14.6					Name 2	0	0	0	0
		Expanded thickness (mm)	2.4937					Electrolyte	2.7216	23.0091	2.47418	39.2989
		x length (mm)	60					Tab	0.0365215	0.308762	0.007296	0.115887
		y length (mm)	10					Tab lead	0.11601	0.98078	0.02	0.317672
		Width (mm)	41.5					Pouch film	0.928076	7.84621	0.561311	8.91563
		Area (cm2)	24.9					Total	11.8283	100	6.29581	100
		Volume (cm3)	6.30234
		Free space (cm3)	0.00653753
		Weight (g)	11.8283
		Density (g/cm-3)	1.87682
	Spec.	Capacity (Ah)	1.08864
		Voltage (V)	3.8
		Energy (Wh)	4.13683
		Energy density (Whkg-1)	349.739
		Energy density (Whl-1)	656.396

## Sheet: LMB(S)
		S utilization (%)	Cs	N/P	E/C	Layer n.	Vav	Obtained capacity (Ah)	Expansion rate (%)		Free space (cm3)		Gravimetric energy density (Whkg-1)			309.411
		80	4	2.5	2.5	7	2.15	1.08864	3.6		0.000671552		Volumetric energy density (Whl-1)			411.473
	Cathode						Anode						Separator						Tab, Tab lead			Electrolyte
	Material	Substance	S	Carbon	Binder	Total	Material	Substance	Li	Carbon 2	Binder 2	Total	Material	Substance	Base film	Coating	Binder 3	Total	Tab	Length (mm)	6	Code	Name	wt%	Wt (g)
		Specific capacity (mAhg-1)	1337.6	0	0	1337.6		Specific capacity (mAhg-1)	3860	0	0	3860			PE	Name 1	Name 2			Width (mm)	8	Solute	Name	0	0
		Mixing ratio (wt%)	70	20	10	100		Mixing ratio (wt%)	100	0	0	100		Load (mgcm-2)	1.093	0	0	1.093		Area (cm2)	0.48		Name	0	0
		True density (gcm-3)	2.07	1.4	1.78	1.8615		True density (gcm-3)	0.534	0	0	0.534		True density (gcm-3)	0.93	0	0	0.93	+ Tab (Al)	Thickness (mm)	12	Solvent	Name	0	0
		Weight (g)	0.116268	0.0332194	0.0166097	0.166097		Weight (g)	0.100725	0	0	0.100725		Weight (g)	0.0507152	0	0	0.0507152		Volume (cm3)	0.000576		Name	0	0
		Volume (cm3)	0.0561681	0.0237282	0.0093313	0.0892275		Volume (cm3)	0.188624	0	0	0.188624		Volume (cm3)	0.0545325	0	0	0.0545325		Weight (g)	0.00155462		Name	0	0
	Composite	Thickness (mm)	66				Composite	Thickness (mm)	45.5				Base film	Thickness (mm)	20				- Tab (Cu)	Thickness (mm)	8	Additive	Name	0	0
		A length (mm)	54					A length (mm)	55.5					#1 length (mm)	58					Volume (cm3)	0.000384		Name	0	0
		B length (mm)	54					B length (mm)	55.5					#2 length (mm)	58					Weight (g)	0.00344064		Name	0	0
		Width (mm)	36					Width (mm)	37.5					Width (mm)	40				Tab lead	Length (mm)	20	Total		0	0
		Area (A+B) (cm2)	38.88					Area (A+B) (cm2)	41.625					Area (cm2)	46.4					Width (mm)	5	Density (gcm-3)			1.1
		Volume (A+B) (cm3)	0.256608					Volume (A+B) (cm3)	0.189394					Volume (cm3)	0.0928					Area (cm2)	1	Load (gAh-1)			2.5
		Weight (A+B) (g)	0.166097					Weight (A+B) (g)	0.100725					Weight (g)	0.0507152				+ Tab lead (Al)	Thickness (mm)	100	Weight (g)			0.3888
		Density (gcm-3)	0.647279					Density (gcm-3)	0.531831					Density (gcm-3)	0.5465					Volume (cm3)	0.01	Volume (cm3)			0.353455
		AM load (mgcm-2)	2.99043					AM load (mgcm-2)	2.41983				Pore	Volume (cm3)	0.0382675					Weight (g)	0.02699	Allocation
		Areal capacity (mAhcm-2)	4					Areal capacity (mAhcm-2)	9.34054					Porosity (%)	41.2366					Density (gcm-3)	2.699	Electrolyte	Place	Const.	Wt (g)
	Pore	Volume (cm3)	0.16738				Pore	Volume (cm3)	0.000769427				Coating layer	Thickness (A+B) (mm)	0				- Tabl lead (Ni/Cu)	Thickness (mm)	100	Pore uptake (cm3)	Cathode	0.16738	0.184119
		Porosity (%)	65.2281					Porosity (%)	0.406258					Length (#1+#2) (mm)	116					Volume (cm3)	0.01		Anode	0.000769427	0.000846369
	Substrate (Al)	Thickness (mm)	12				Substrate (Cu)	Thickness (mm)	8					Width (mm)	40					Weight (g)	0.08902		Base film	0.0382675	0.0420943
		Length (mm)	54					Length (mm)	55.5					Area (cm2)	46.4					Density (gcm-3)	8.902		Coating layer	1e-05	1.1e-05
		Width (mm)	36					Width (mm)	37.5					Volume (cm3)	1e-05				Pouch film			Absorption uptake (gg-1)	Binder	0	0
		Area (cm2)	19.44					Area (cm2)	20.8125					Weight (g)	0				Nylon/Al/CPP	Thickness (mm)	88		Carbon 2	0	0
		Volume (cm3)	0.023328					Volume (cm3)	0.01665					Density (gcm-3)	0					Length (mm)	144.494		Binder 2	0	0
		Weight (g)	0.0629623					Weight (g)	0.149184				Pore	Volume (cm3)	1e-05					Width (mm)	43.7471		Name 1	0	0
		Density (gcm-3)	2.699					Density (gcm-3)	8.96					Porosity (%)	100					Area (cm2)	63.212		Name 2	0	0
	Electrode	Thickness (mm)	144				Electrode	Thickness (mm)	99				Coating separator	Thickness (mm)	20					Volume (cm3)	0.556265	SEI formation (mgcm-2)	Cathode	0	0
		Volume (cm3)	0.279936					Volume (cm3)	0.206044					Volume (cm3)	0.09281					Weight (g)	0.919734		Anode	0	0
		Weight (g)	0.229059					Weight (g)	0.249909					Weight (g)	0.0507152					Load (mgcm-2)	14.55	Void (cm3)	Free space	0.147027	0.16173
	Cell							Material	Wt (g)	Wt (%)	Vol (cm3)	Vol (%)
	Element	Thickness (mm)	283					S	0.813876	10.759	0.393177	6.91286
		Length (mm)	58					Carbon	0.232536	3.07399	0.166097	2.92033
		Width (mm)	40					Binder	0.116268	1.537	0.0653191	1.14845
		Area (cm2)	23.2					Substrate (Al)	0.503698	6.65861	0.186624	3.28124
		Volume (cm3)	0.933204					Li	0.705078	9.32073	1.32037	23.2149
		Weight (g)	0.923479					Carbon 2	0	0	0	0
		N/P raio	2.5					Binder 2	0	0	0	0
		Capacity (mAh)	155.52					Substrate (Cu)	1.04429	13.8049	0.11655	2.04919
	Package	Layer number	7					PE	0.355006	4.69299	0.381727	6.71156
		Thickness (mm)	2.169					Name 1	0	0	0	0
		Expansion (%)	3.6					Name 2	0	0	0	0
		Expanded thickness (mm)	2.24708					Electrolyte	2.7216	35.978	2.47418	43.5013
		x length (mm)	60					Tab	0.0365215	0.482793	0.007296	0.128279
		y length (mm)	10					Tab lead	0.11601	1.53359	0.02	0.351642
		Width (mm)	41.5					Pouch film	0.919734	12.1584	0.556265	9.78031
		Area (cm2)	24.9					Total	7.56462	100	5.68761	100
		Volume (cm3)	5.68828
		Free space (cm3)	0.000671552
		Weight (g)	7.56462
		Density (g/cm-3)	1.32986
	Spec.	Capacity (Ah)	1.08864
		Voltage (V)	2.15
		Energy (Wh)	2.34058
		Energy density (Whkg-1)	309.411
		Energy density (Whl-1)	411.473

## Sheet: LMB(O2)
		Carbon capacity (mAh/g)	Cs	N/P	E/C	Layer n.	Vav	Obtained capacity (Ah)	Expansion rate (%)		Free space (cm3)		Gravimetric energy density (Whkg-1)			365.505	* Only weight of least ncessary O2 was considered.
		1500	4	2.5	2.5	7	2.7	1.08864	0		1.23284		Volumetric energy density (Whl-1)			399.698
	Cathode						Anode						Separator						Tab, Tab lead			Electrolyte
	Material	Substance	Carbon	Binder 1	O2	Total	Material	Substance	Li	Carbon 2	Binder 2	Total	Material	Substance	Base film	Coating	Binder 3	Total	Tab	Length (mm)	6	Code	Name	wt%	Wt (g)
		Specific capacity (mAhg-1)	1500	0	1675	1500		Specific capacity (mAhg-1)	3860	0	0	3860			PE	Name 1	Name 2			Width (mm)	8	Solute	Name	0	0
		Mixing ratio (wt%)	100	0	0	100		Mixing ratio (wt%)	100	0	0	100		Load (mgcm-2)	1.093	0	0	1.093		Area (cm2)	0.48		Name	0	0
		True density (gcm-3)	1.4	0	0	-		True density (gcm-3)	0.534	0	0	0.534		True density (gcm-3)	0.93	0	0	0.93	+ Tab (Ni/PET)	Thickness (mm)	45	Solvent	Name	0	0
		Weight (g)	0.10368	0	0.0928478	0.196528		Weight (g)	0.100725	0	0	0.100725		Weight (g)	0.0507152	0	0	0.0507152		Volume (cm3)	0.00216		Name	0	0
		Volume (cm3)	0.0740571	0	*	0.0740571		Volume (cm3)	0.188624	0	0	0.188624		Volume (cm3)	0.0545325	0	0	0.0545325		Weight (g)	0.0020952		Name	0	0
	Composite	Thickness (mm)	100				Composite	Thickness (mm)	46				Base film	Thickness (mm)	20				- Tab (Cu)	Thickness (mm)	8	Additive	Name	0	0
		A length (mm)	54					A length (mm)	55.5					#1 length (mm)	58					Volume (cm3)	0.000384		Name	0	0
		B length (mm)	54					B length (mm)	55.5					#2 length (mm)	58					Weight (g)	0.00344064		Name	0	0
		Width (mm)	36					Width (mm)	37.5					Width (mm)	40				Tab lead	Length (mm)	20	Total		0	0
		Area (A+B) (cm2)	38.88					Area (A+B) (cm2)	41.625					Area (cm2)	46.4					Width (mm)	5	Density (gcm-3)			1.1
		Volume (A+B) (cm3)	0.3888					Volume (A+B) (cm3)	0.191475					Volume (cm3)	0.0928					Area (cm2)	1	Load (gAh-1)			2.5
		Weight (A+B) (g)	0.196528					Weight (A+B) (g)	0.100725					Weight (g)	0.0507152				+ Tab lead (Ni/Cu)	Thickness (mm)	100	Weight (g)			0.3888
		Density (gcm-3)	0.266667					Density (gcm-3)	0.52605					Density (gcm-3)	0.5465					Volume (cm3)	0.01	Volume (cm3)			0.353455
		AM load (mgcm-2)	2.66667					AM load (mgcm-2)	2.41983				Pore	Volume (cm3)	0.0382675					Weight (g)	0.089	Allocation
		Areal capacity (mAhcm-2)	4					Areal capacity (mAhcm-2)	9.34054					Porosity (%)	41.2366					Density (gcm-3)	8.9	Electrolyte	Place	Const.	Wt (g)
	Pore	Volume (cm3)	0.314743				Pore	Volume (cm3)	0.00285068				Coating layer	Thickness (A+B) (mm)	0				- Tabl lead (Ni/Cu)	Thickness (mm)	100	Pore uptake (cm3)	Cathode	0.314743	0.346217
		Porosity (%)	80.9524					Porosity (%)	1.4888					Length (#1+#2) (mm)	116					Volume (cm3)	0.01		Anode	0.00285068	0.00313574
	Substrate (Ni/PET)	Thickness (mm)	45				Substrate (Cu)	Thickness (mm)	8					Width (mm)	40					Weight (g)	0.08902		Base film	0.0382675	0.0420943
		Length (mm)	54					Length (mm)	55.5					Area (cm2)	46.4					Density (gcm-3)	8.902		Coating layer	1e-05	1.1e-05
		Width (mm)	36					Width (mm)	37.5					Volume (cm3)	1e-05				Pouch film			Absorption uptake (gg-1)	O2	0	0
		Area (cm2)	19.44					Area (cm2)	20.8125					Weight (g)	0				Nylon/Al/CPP	Thickness (mm)	88		Carbon 2	0	0
		Volume (cm3)	0.08748					Volume (cm3)	0.01665					Density (gcm-3)	0					Length (mm)	145.832		Binder 2	0	0
		Weight (g)	0.0848556					Weight (g)	0.149184				Pore	Volume (cm3)	1e-05					Width (mm)	44.416		Name 1	0	0
		Density (gcm-3)	0.97					Density (gcm-3)	8.96					Porosity (%)	100					Area (cm2)	64.7727		Name 2	0	0
	Electrode	Thickness (mm)	245				Electrode	Thickness (mm)	100				Coating separator	Thickness (mm)	20					Volume (cm3)	0.57	SEI formation (mgcm-2)	Cathode	0	0
		Volume (cm3)	0.47628					Volume (cm3)	0.208125					Volume (cm3)	0.09281					Weight (g)	0.942443		Anode	0	0
		Weight (g)	0.281383					Weight (g)	0.249909					Weight (g)	0.0507152					Load (mgcm-2)	14.55	Void (cm3)	Free space	-0.00241652	-0.00265817
	Cell							Material	Wt (g)	Wt (%)	Vol (cm3)	Vol (%)
	Element	Thickness (mm)	385					Carbon	0.72576	9.02482	0.5184	8.46915
		Length (mm)	58					Binder 1	0	0	0	0
		Width (mm)	40					O2	0.649934	8.08193	0	0
		Area (cm2)	23.2					Substrate (Ni/PET)	0.678845	8.44143	0.69984	11.4334
		Volume (cm3)	1.13321					Li	0.705078	8.76764	1.32037	21.571
		Weight (g)	0.976344					Carbon 2	0	0	0	0
		N/P raio	2.5					Binder 2	0	0	0	0
		Capacity (mAh)	155.52					Substrate (Cu)	1.04429	12.9857	0.11655	1.90409
	Package	Layer number	7					PE	0.355006	4.4145	0.381727	6.23632
		Thickness (mm)	2.916					Name 1	0	0	0	0
		Expansion (%)	0					Name 2	0	0	0	0
		Expanded thickness (mm)	2.916					Electrolyte	2.7216	33.8431	2.47418	40.421
		x length (mm)	60					Tab	0.0408461	0.507921	0.019968	0.326219
		y length (mm)	10					Tab lead	0.17802	2.21368	0.02	0.326742
		Width (mm)	41.5					Pouch film	0.942443	11.7193	0.57	9.31215
		Area (cm2)	24.9					Total	8.04182	100	6.12104	100
		Volume (cm3)	7.35388
		Free space (cm3)	1.23284
		Weight (g)	8.04182
		Density (g/cm-3)	1.09355
	Spec.	Capacity (Ah)	1.08864
		Voltage (V)	2.7
		Energy (Wh)	2.93933
		Energy density (Whkg-1)	365.505
		Energy density (Whl-1)	399.698
